# Supplementary material for: Genome Sequencing and Comparative Analysis of Saccharomyces cerevisiae Strains of the Peterhof Genetic Collection
Source: PLOS journal article supplement (doi:10.1371/journal.pone.0154722), 2016-05-06
Supplement: S1 (10.1371/journal.pone.0154722.s001) [file journal.pone.0154722.s001]

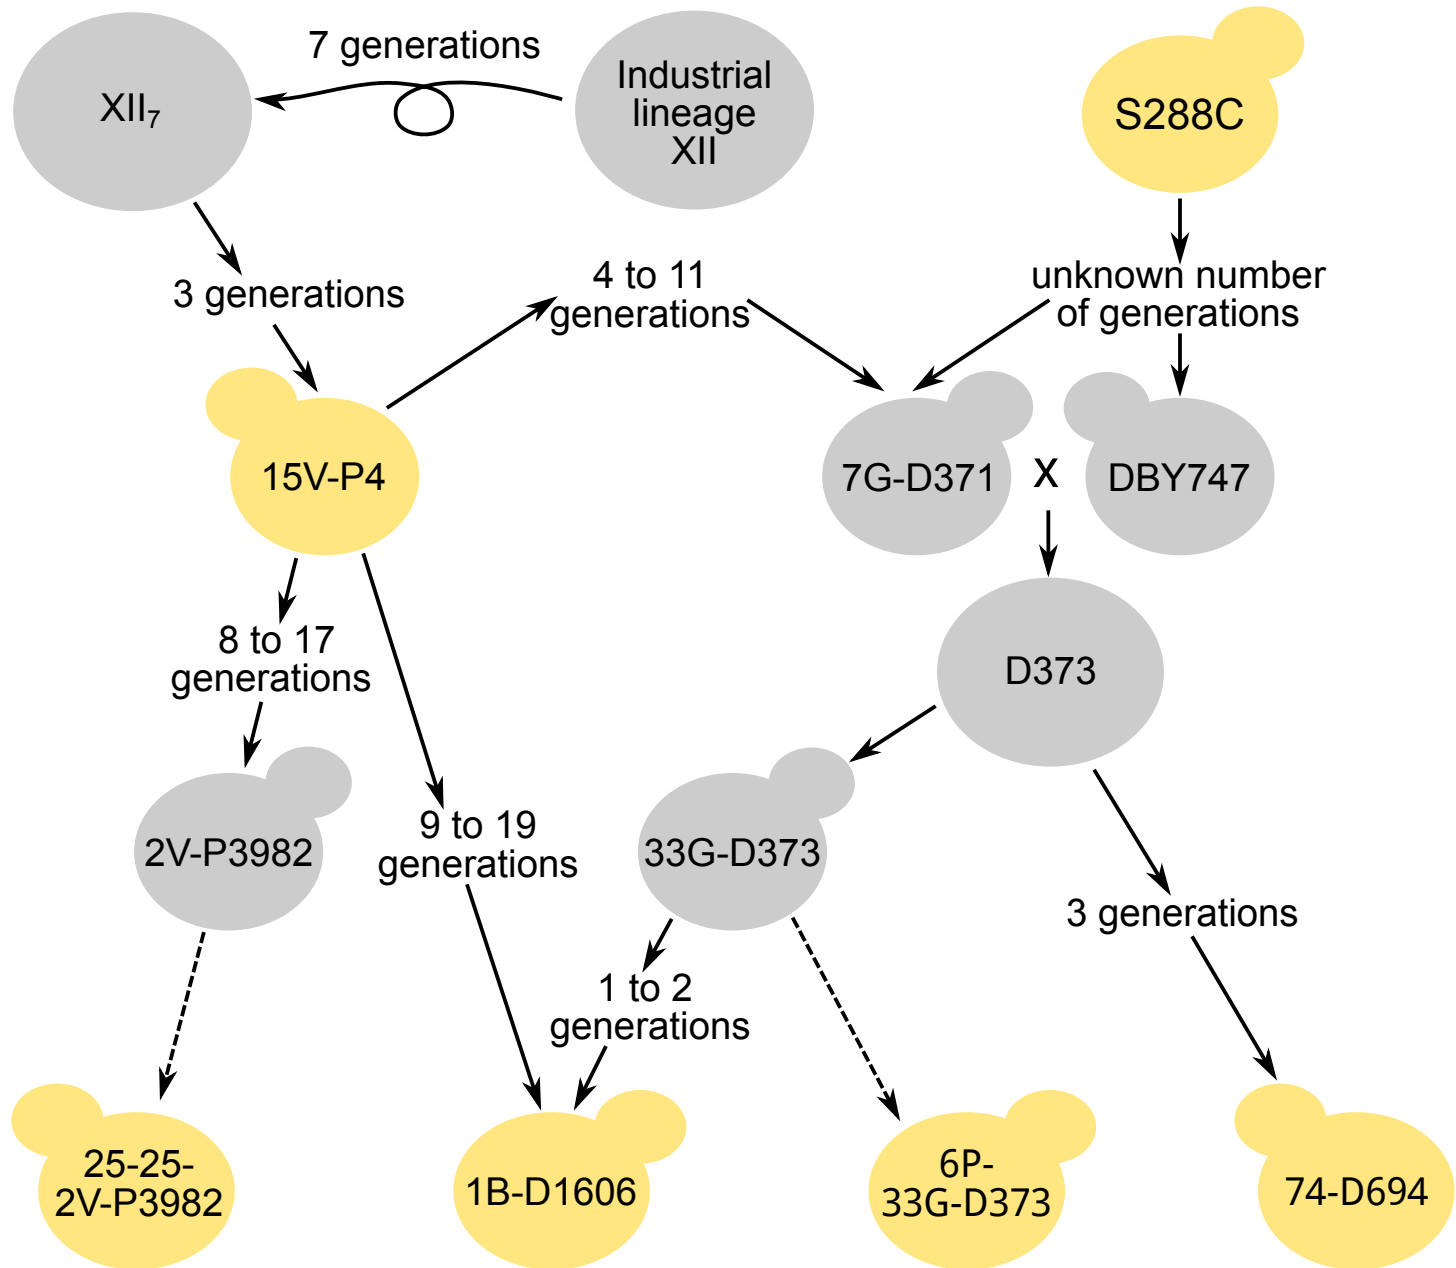

S1 Fig  
**Pedigree of the strains**

Names of strains with sequenced genomes are shown on yellow background. The number of generations is counted as the number of meiotic events between two strains. *MATa* strains are depicted left-budded and *MATα* are right-budded. Diploids are unbudded. Curved arrow indicates self-fertilization. Dashed arrows indicate genetic manipulations without crossing. 25-25-2V-P3982 (the full name of the strain is 25-25-dU8-132-L28-2V-P3982) is an auxotrophic and suppressor mutant derivative of 2V-P3982 [23, 24]. 6P-33G-D373 is a 33G-D373 derivative in which *SUP35* is replaced with its homolog from *Pichia methanolica* [25].
