# Supplementary material for: Genome Sequencing and Comparative Analysis of Saccharomyces cerevisiae Strains of the Peterhof Genetic Collection
Source: PLoS One. 2016 May 6;11(5):e0154722. doi: 10.1371/journal.pone.0154722 (PMC4859572; doi:10.1371/journal.pone.0154722)
Supplement: S4 Table — (XLS) [file pone.0154722.s012.xls]

## Sheet: Deleted
Deleted regions
15V-P4					25-25-2V-P3982					1B-D1606					74-D694					6P-33G-D373
I	198526	199556	1030		I	198526	199556	1030		I	198526	202630	4104		I	198526	202630	4104		II	681411	682527	1116
I	200630	202630	2000		I	200630	202630	2000		III	149264	151273	2009		III	149264	151273	2009		II	779792	781112	1320
III	308670	313714	5044		V	116248	117248	1000		V	568133	569133	1000		III	308670	310714	2044		IV	635933	637019	1086
IV	4173	11572	7399		V	568133	569133	1000		VI	15669	29704	14035		III	311714	313714	2000		IV	808169	810289	2120
IV	13619	14648	1029		VI	15669	29704	14035		VIII	8380	11380	3000		VIII	93629	94629	1000		V	326705	327705	1000
V	568133	569133	1000		VII	986998	987998	1000		IX	26472	29531	3059		IX	26472	29531	3059		VI	97008	98035	1027
VI	15669	29704	14035		VIII	92629	93629	1000		IX	137918	138918	1000		XI	649391	658391	9000		VI	103426	104454	1028
VII	402486	403486	1000		IX	26472	29531	3059		XI	649391	658391	9000		XV	721851	722969	1118		VII	78934	79991	1057
VIII	93629	94629	1000		XI	230643	231643	1000		Mito	26779	28242	1463		SUM			24334		VII	165788	166788	1000
IX	26472	29531	3059		XI	649391	651391	2000		Mito	38560	39612	1052							VII	233341	234341	1000
IX	137918	138918	1000		XI	653391	658391	5000					39722							VII	609737	610802	1065
X	731109	733156	2047		XII	803159	804199	1040												VII	720024	721176	1152
X	734156	740522	6366		XV	3473	10998	7525												VII	986998	987998	1000
XI	649391	652391	3000		XV	14066	18603	4537												VIII	8380	11380	3000
XI	653391	658391	5000		XV	19603	21603	2000												IX	26472	29531	3059
XII	14268	16268	2000		Mito	21459	22608	1149												XI	280482	281670	1188
XII	469629	471629	2000		Mito	26779	29435	2656												XI	580530	581548	1018
XII	472629	475676	3047		Mito	38560	39612	1052												XI	649391	651391	2000
XII	482648	485648	3000		Mito	41769	42803	1034												XI	654391	657391	3000
XII	486695	488695	2000					53117												XII	54683	55683	1000
XIV	776977	781060	4083																	XII	555215	556532	1317
XV	1143	10998	9855																	XII	722658	723742	1084
Mito	14104	15104	1000																	XIII	355730	356832	1102
Mito	19191	20330	1139																	XIII	488955	489983	1028
Mito	21459	22608	1149																	XIV	288986	290132	1146
Mito	28242	29435	1193																	XV	423515	424515	1000
			84475																	XVI	765989	766989	1000
																							36913

## Sheet: Amplified
Amplified regions
15V-P4					25-25-2V-P3982					1B-D1606					74-D694					6P-33G-D373
I	0	3131	3131		I	0	3131	3131		I	0	3131	3131		I	0	3131	3131		I	0	3131	3131
I	24216	27240	3024		I	24216	27240	3024		I	24216	27240	3024		I	14847	15847	1000		I	11174	12234	1060
I	176090	177153	1063		I	218633	226895	8262		I	218633	226895	8262		I	19847	20847	1000		I	13816	14847	1031
I	203630	207124	3494		I	227969	228969	1000		I	227969	228969	1000		I	21847	23157	1310		I	23157	28240	5083
I	218633	226895	8262		I	139730	140730	1000		I	139730	140730	1000		I	24216	27240	3024		I	138400	141730	3330
II	801189	802189	1000		I	176090	177153	1063		I	176090	177153	1063		I	139730	140730	1000		I	176090	177153	1063
II	803189	812212	9023		I	182153	183817	1664		I	181153	182153	1000		I	176090	177153	1063		I	203630	208315	4685
III	0	1367	1367		I	187817	188817	1000		I	203630	207124	3494		I	207124	208315	1191		I	210633	211633	1000
III	11603	12642	1039		I	203630	207124	3494		II	0	9756	9756		I	216633	218633	2000		I	217633	219668	2035
I	227969	228969	1000		II	0	12756	12756		II	196298	197674	1376		I	221752	226895	5143		I	220752	226895	6143
II	0	9756	9756		II	15756	21756	6000		II	429409	430409	1000		I	227969	228969	1000		I	227969	228969	1000
III	83637	91146	7509		II	22756	25780	3024		II	805189	812212	7023		II	0	9756	9756		II	0	9756	9756
III	198345	200416	2071		II	26780	38287	11507		III	0	1367	1367		II	196298	197674	1376		II	59537	60537	1000
III	292880	293919	1039		II	39357	40357	1000		III	314714	315749	1035		II	805189	807189	2000		II	88031	89060	1029
III	303600	308670	5070		II	41392	42392	1000		IV	0	3173	3173		II	808189	812212	4023		I	52572	53572	1000
IV	0	2173	2173		II	46450	47450	1000		IV	11572	12572	1000		III	0	1367	1367		II	196298	197674	1376
IV	15702	16702	1000		II	49506	50506	1000		IV	15702	16702	1000		III	11603	12642	1039		II	255957	256957	1000
IV	133767	134767	1000		II	52506	53506	1000		IV	17702	18702	1000		III	83637	91146	7509		II	300734	301734	1000
IV	227934	228934	1000		II	55506	56506	1000		IV	44931	45931	1000		III	151273	161714	10441		II	333457	334457	1000
IV	358508	359672	1164		II	59537	62537	3000		IV	527503	538641	11138		III	162740	170099	7359		II	427360	430409	3049
IV	527503	529503	2000		II	68809	75995	7186		IV	568279	569324	1045		III	199345	200416	1071		II	477390	479390	2000
IV	531572	533572	2000		II	102154	103154	1000		IV	1153680	1155680	2000		III	292880	293919	1039		II	590794	592794	2000
II	59537	60537	1000		II	105154	106154	1000		IV	1159680	1161680	2000		III	305629	308670	3041		II	633167	634167	1000
II	196298	197674	1376		II	111154	114154	3000		IV	1162680	1164680	2000		IV	0	14648	14648		II	660233	661233	1000
II	427360	428409	1049		II	119230	120253	1023		IV	1522555	1531337	8782		IV	15702	18702	3000		II	717322	718322	1000
II	429409	430409	1000		II	138709	139709	1000		V	0	7661	7661		IV	43931	45931	2000		II	805189	812212	7023
IV	535641	537641	72610		II	158777	159777	1000		V	19857	20857	1000		IV	527503	538641	11138		III	0	1367	1367
IV	568279	569324	1045		II	193246	194298	1052		V	21874	22874	1000		IV	568279	569324	1045		III	11603	13676	2073
IV	980744	993403	12659		II	196298	197674	1376		V	62991	64991	2000		IV	980744	993403	12659		III	91146	93175	2029
IV	1407058	1421256	14198		II	215637	216696	1059		V	434057	435870	1813		IV	1153680	1155680	2000		III	152660	154679	2019
IV	1423290	1426290	3000		II	238736	239736	1000		V	569133	576724	7591		IV	1159680	1161680	2000		III	155679	158714	3035
IV	1428429	1437429	9000		II	266328	267328	1000		VI	0	11613	11613		IV	1163680	1164680	1000		III	163740	164776	1036
IV	1442483	1447483	5000		II	268328	269328	1000		VI	12669	13669	1000		IV	1243715	1245715	2000		III	165776	167776	2000
IV	1449483	1451483	2000		II	282560	283560	1000		VI	30704	31704	1000		IV	1522555	1531337	8782		III	268114	269114	1000
IV	1453513	1456513	3000		II	299674	301734	2060		VI	99035	100052	1017		V	0	7661	7661		III	303600	305629	2029
IV	1457557	1462663	5106		II	303734	304734	1000		VI	136861	144062	7201		V	19857	22874	3017		III	306629	308670	2041
IV	1522555	1531337	8782		II	308734	309734	1000		VI	220227	221227	1000		V	62991	64991	2000		III	313714	314714	1000
V	0	7661	7661		II	321831	322831	1000		VII	0	1067	1067		V	431990	450615	18625		IV	0	3173	3173
V	19857	22874	3017		II	333457	334457	1000		VII	6067	8067	2000		V	569133	576724	7591		IV	5173	7173	2000
V	62991	64991	2000		II	335518	336582	1064		VII	185214	186214	1000		VI	0	8564	8564		IV	8514	10572	2058
V	277294	278294	1000		II	395811	396811	1000		VII	422481	423508	1027		VI	9595	11613	2018		IV	11572	13619	2047
V	289785	290785	1000		II	404903	406935	2032		VII	546223	550295	4072		VI	12669	14669	2000		IV	15702	18702	3000
V	397259	398259	1000		II	411021	412021	1000		VII	551295	555295	4000		VI	30704	31704	1000		IV	29813	30813	1000
V	442714	450615	7901		II	414021	415021	1000		VII	556330	561381	5051		VI	99035	100052	1017		IV	43931	45931	2000
V	569133	576724	7591		II	426360	428409	2049		VII	763735	764801	1066		VI	136861	144062	7201		IV	83253	84253	1000
VI	0	13669	13669		II	429409	431409	2000		VII	1067410	1069410	2000		VII	0	1067	1067		IV	123555	124598	1043
VI	30704	31704	1000		II	458626	459626	1000		VII	1076410	1090021	13611		VII	6067	9067	3000		IV	133767	134767	1000
VI	99035	100052	1017		II	460929	461929	1000		VIII	0	7380	7380		VII	204512	205870	1358		IV	219773	220773	1000
VI	136861	144062	7201		II	477390	479390	2000		VIII	11380	12427	1047		VII	404486	405945	1459		IV	308753	309753	1000
VII	0	1067	1067		II	500712	501712	1000		VIII	132772	134622	1850		VII	422481	423508	1027		IV	382983	384203	1220
VII	4067	11067	7000		II	519868	520868	1000		VIII	214140	215180	1040		VII	544171	547223	3052		IV	417406	418406	1000
VII	204512	205870	1358		II	592794	593794	1000		VIII	287823	288823	1000		VII	548295	557381	9086		IV	472614	473614	1000
VII	422481	423508	1027		II	605935	606935	1000		VIII	525641	527799	2158		VII	558381	561381	3000		IV	491673	492673	1000
VII	544171	545171	1000		II	607935	608935	1000		VIII	539257	562223	22966		VII	763735	764801	1066		IV	527503	538641	11138
VII	763735	764801	1066		II	615977	616977	1000		IX	0	11024	11024		VII	883017	884017	1000		IV	568279	569324	1045
VII	857393	858393	1000		II	627051	628051	1000		IX	12053	22123	10070		VII	1001116	1002116	1000		IV	590647	591647	1000
VII	883017	884017	1000		II	636167	637167	1000		IX	23148	24897	1749		VII	1067410	1069410	2000		IV	667921	669455	1534
VII	1064376	1065376	1000		II	644915	645915	1000		IX	37570	39652	2082		VII	1076410	1078410	2000		IV	980744	993403	12659
VII	1066410	1069410	3000		II	649020	650141	1121		IX	299978	301306	1328		VII	1079410	1090021	10611		IV	1153680	1155680	2000
VII	1076410	1090021	13611		II	660233	663233	3000		IX	335625	336929	1304		VIII	0	7380	7380		IV	1159680	1161680	2000
VIII	0	7380	7380		II	675305	676305	1000		IX	431403	434461	3058		VIII	11380	12427	1047		IV	1162680	1164680	2000
VIII	11380	12427	1047		II	683580	684580	1000		IX	436493	439493	3000		VIII	132772	134622	1850		IV	1242715	1245715	3000
VIII	132772	134622	1850		II	703205	704205	1000		X	0	11009	11009		VIII	212119	216180	4061		IV	1274986	1275986	1000
VIII	212119	213140	1021		II	706205	707205	1000		X	12038	21108	9070		VIII	527799	529939	2140		IV	1352264	1353847	1583
VIII	214140	215180	1040		II	711205	712205	1000		X	115474	116474	1000		VIII	532257	533257	1000		IV	1364918	1365918	1000
VIII	287823	288823	1000		II	722482	723482	1000		X	153592	154592	1000		VIII	537257	539257	2000		IV	1522555	1531337	8782
VIII	291860	292860	1000		II	724482	726513	2031		X	355234	356234	1000		VIII	542376	543376	1000		V	0	6661	6661
VIII	504123	505182	1059		II	734533	736533	2000		X	374182	375353	1171		VIII	550455	553564	3109		V	19857	22874	3017
VIII	525641	527799	2158		II	737533	738575	1042		X	453406	454406	1000		VIII	554642	562223	7581		V	62991	64991	2000
VIII	539257	562223	22966		II	739575	741575	2000		X	728055	730055	2000		IX	0	21123	21123		V	235860	236860	1000
X	0	10009	10009		II	756575	758575	2000		X	733156	734156	1000		IX	22123	23148	1025		V	266266	267266	1000
X	12038	21108	9070		II	762677	763677	1000		X	742522	744522	2000		IX	431403	435461	4058		V	269266	270266	1000
X	73927	74927	1000		II	770717	771717	1000		XI	0	3126	3126		IX	437493	439493	2000		V	362834	363876	1042
X	115474	116474	1000		II	777792	779792	2000		XI	457399	458731	1332		X	0	21108	21108		V	397259	398259	1000
X	153592	154592	1000		II	781112	783112	2000		XI	555025	556025	1000		X	27108	28108	1000		V	550439	551439	1000
X	204393	205393	1000		II	786112	787112	1000		XI	665545	666545	1000		X	153592	154592	1000		V	569133	576724	7591
X	338336	339336	1000		II	789112	791112	2000		XII	0	14268	14268		X	338336	339336	1000		VI	0	15669	15669
X	355234	356234	1000		II	794112	796112	2000		XII	93928	94970	1042		X	355234	356234	1000		VI	30704	31704	1000
X	374182	375353	1171		II	798189	800189	2000		XII	96076	97076	1000		X	374182	375353	1171		VI	52885	53885	1000
X	453406	454406	1000		II	801189	802189	1000		XII	451193	489695	38502		X	453406	454406	1000		VI	99035	100052	1017
X	728055	730055	2000		II	803189	812212	9023		XII	628219	629219	1000		X	728055	730055	2000		VI	101380	102380	1000
X	742522	744522	2000		III	0	1367	1367		XII	1003426	1004426	1000		X	731109	744522	13413		VI	136861	144062	7201
XI	0	3126	3126		III	11603	12642	1039		XII	1061774	1078164	16390		XI	0	3126	3126		VI	161419	162944	1525
XI	457399	458731	1332		III	198345	200416	2071		XIII	0	8684	8684		XI	457399	458731	1332		VI	204443	205831	1388
XI	555025	556025	1000		III	292880	293919	1039		XIII	503026	505144	2118		XI	555025	556025	1000		VI	220227	221227	1000
XI	665545	666545	1000		III	294919	296532	1613		XIII	917449	923596	6147		XI	665545	666545	1000		VII	0	1067	1067
XII	0	14268	14268		III	303600	308670	5070		XIV	0	16790	16790		XII	0	14268	14268		VII	6067	9067	3000
XII	93928	94970	1042		IV	0	3173	3173		XIV	252286	253286	1000		XII	96076	97076	1000		VII	11067	12067	1000
XII	96076	97076	1000		IV	11572	13619	2047		XIV	442599	443648	1049		XII	451193	469629	18436		VII	227277	228308	1031
XII	451193	469629	18436		IV	15702	18702	3000		XIV	569728	573800	4072		XII	471629	472629	1000		VII	254532	255567	1035
XII	471629	472629	1000		IV	44931	45931	1000		XIV	597931	601963	4032		XII	475676	482648	6972		VII	290443	291443	1000
XII	475676	482648	6972		IV	133767	134767	1000		XIV	750851	752851	2000		XII	485648	486695	1047		VII	364158	365158	1000
XII	485648	486695	1047		IV	471572	472614	1042		XIV	772959	773959	1000		XII	488695	489695	1000		VII	386461	387461	1000
XII	488695	489695	1000		IV	527503	530503	3000		XIV	774977	775977	1000		XII	1003426	1004426	1000		VII	402486	403486	1000
XII	628219	629219	1000		IV	531572	533572	2000		XIV	781060	783060	2000		XII	1060745	1078164	17419		VII	404486	405945	1459
XII	1003426	1004426	1000		IV	535641	537641	2000		XV	0	2143	2143		XIII	0	8684	8684		VII	481003	483037	2034
XII	1051334	1052664	1330		IV	568279	569324	1045		XV	10998	13035	2037		XIII	503026	505144	2118		VII	544171	545171	1000
XII	1059745	1078164	18419		IV	980744	993403	12659		XV	22651	27723	5072		XIII	917449	923596	6147		VII	601661	602661	1000
XIII	0	8684	8684		IV	1153680	1155680	2000		XV	1069860	1072860	3000		XIV	0	16790	16790		VII	648508	649508	1000
XIII	162239	163239	1000		IV	1159680	1161680	2000		XV	1073860	1090678	16818		XIV	252286	253286	1000		VII	740388	741388	1000
XIII	462855	464187	1332		IV	1162680	1163680	1000		XVI	0	25780	25780		XIV	442599	443648	1049		VII	763735	764801	1066
XIII	503026	505144	2118		IV	1243715	1245715	2000		XVI	581629	582629	1000		XIV	569728	573800	4072		VII	773863	774990	1127
XIII	919525	920525	1000		IV	1305592	1306592	1000		XVI	838121	839187	1066		XIV	598931	603043	4112		VII	794096	795096	1000
XIII	922555	923596	1041		IV	1352264	1353847	1583		XVI	930481	947790	17309		XIV	750851	752851	2000		VII	857393	858393	1000
XIV	0	15790	15790		IV	1522555	1531337	8782		Mito	2024	4037	2013		XIV	772959	775977	3018		VII	875623	876952	1329
XIV	252286	253286	1000		V	0	7661	7661		Mito	14104	15104	1000		XIV	781060	783060	2000		VII	883017	884017	1000
XIV	442599	443648	1049		V	19857	22874	3017		Mito	16104	17104	1000		XV	0	1143	1143		VII	1001116	1002116	1000
XIV	569728	573800	4072		V	62991	64991	2000		Mito	18128	19191	1063		XV	10998	11998	1000		VII	1067410	1069410	2000
XIV	597931	603043	5112		V	277294	278294	1000		Mito	20330	21459	1129		XV	22651	28749	6098		VII	1076410	1090021	13611
XIV	750851	752851	2000		V	289785	290785	1000		Mito	24688	26779	2091		XV	575272	577272	2000		VIII	0	7380	7380
XIV	772959	775977	3018		V	442714	450615	7901		Mito	58967	62250	3283		XV	1069860	1072860	3000		VIII	11380	13427	2047
XIV	781060	783060	2000		V	486937	488269	1332		Mito	79536	80784	1248		XV	1073860	1090678	16818		VIII	14427	16427	2000
XV	0	1143	1143		V	550439	551439	1000					474369		XVI	0	25780	25780		VIII	19427	22427	3000
XV	10998	11998	1000		V	569133	576724	7591							XVI	701226	702281	1055		VIII	24427	27427	3000
XV	22651	27723	5072		VI	0	14669	14669							XVI	838121	839187	1066		VIII	30427	31427	1000
XV	463538	464644	1106		VI	30704	31704	1000							XVI	930481	947790	17309		VIII	33473	41633	8160
XV	570842	572272	1430		VI	99035	100052	1017							Mito	0	84263	84263		VIII	42633	43633	1000
XV	576272	577272	1000		VI	136861	144062	7201										613763		VIII	46633	57008	10375
XV	698597	699597	1000		VI	204443	205831	1388												VIII	58060	59149	1089
XV	1071860	1072860	1000		VI	220227	221227	1000												VIII	63261	64261	1000
XV	1074919	1077919	3000		VII	0	1067	1067												VIII	65293	68498	3205
XV	1080009	1081009	1000		VII	6067	9067	3000												VIII	69578	70578	1000
XV	1082045	1090678	8633		VII	11067	12067	1000												VIII	72621	76688	4067
XVI	0	8621	8621		VII	386461	387461	1000												VIII	80688	82721	2033
XVI	9658	11658	2000		VII	400882	402486	1604												VIII	92629	93629	1000
XVI	13691	16741	3050		VII	403486	405945	2459												VIII	94629	95661	1032
XVI	17780	19780	2000		VII	422481	423508	1027												VIII	96661	100731	4070
XVI	20780	25780	5000		VII	534600	542171	7571												VIII	102731	107807	5076
XVI	838121	839187	1066		VII	544171	545171	1000												VIII	109807	110807	1000
XVI	880120	881461	1341		VII	763735	764801	1066												VIII	117488	119541	2053
XVI	930481	934952	4471		VII	827828	828828	1000												VIII	122603	128722	6119
XVI	940236	947790	7554		VII	883017	884017	1000												VIII	129722	134622	4900
IX	0	10024	10024		VII	1067410	1069410	2000												VIII	136683	138707	2024
IX	12053	22123	10070		VII	1076410	1090021	13611												VIII	140707	147351	6644
IX	23148	24897	1749		VIII	0	7380	7380												VIII	148484	149513	1029
IX	37570	39652	2082		VIII	11380	13427	2047												VIII	152513	153513	1000
IX	182925	183950	1025		VIII	73621	74621	1000												VIII	157513	163537	6024
IX	204734	211162	6428		VIII	132772	134622	1850												VIII	164537	165537	1000
IX	323647	325325	1678		VIII	212119	213140	1021												VIII	168567	169658	1091
IX	335625	336929	1304		VIII	504123	505182	1059												VIII	170658	175817	5159
IX	431403	434461	3058		VIII	525641	528939	3298												VIII	176817	178834	2017
IX	437493	439493	2000		VIII	539257	562223	22966												VIII	179834	183834	4000
Mito	2024	4037	2013		IX	0	22123	22123												VIII	184834	186834	2000
Mito	9469	12832	3363		IX	23148	24897	1749												VIII	187856	188856	1000
Mito	24688	25722	1034		IX	29531	35570	6039												VIII	189906	192906	3000
Mito	32488	34313	1825		IX	37570	38570	1000												VIII	199006	201006	2000
Mito	52778	54579	1801		IX	40652	41652	1000												VIII	204006	210006	6000
Mito	58967	62250	3283		IX	45725	48754	3029												VIII	212119	213140	1021
Mito	79536	80784	1248		IX	49785	50785	1000												VIII	214140	215180	1040
SUM			458407		IX	51906	53906	2000												VIII	217180	220180	3000
					IX	54940	59000	4060												VIII	221180	223256	2076
					IX	60000	61000	1000												VIII	225289	229374	4085
					IX	62000	63000	1000												VIII	232418	240833	8415
					IX	68000	71000	3000												VIII	241833	243910	2077
					IX	72000	73000	1000												VIII	245910	248910	3000
					IX	76050	78050	2000												VIII	250910	253062	2152
					IX	81050	88084	7034												VIII	265301	267301	2000
					IX	90084	92084	2000												VIII	268301	269372	1071
					IX	93084	94084	1000												VIII	271479	273509	2030
					IX	97178	98178	1000												VIII	274509	277541	3032
					IX	99178	100178	1000												VIII	278541	281581	3040
					IX	101178	104218	3040												VIII	282601	284753	2152
					IX	107578	109578	2000												VIII	285753	289823	4070
					IX	117578	118578	1000												VIII	290860	292860	2000
					IX	124578	127578	3000												VIII	294886	297886	3000
					IX	130720	133720	3000												VIII	298909	302909	4000
					IX	145044	146044	1000												VIII	304909	305909	1000
					IX	150342	151342	1000												VIII	307909	308909	1000
					IX	152342	153342	1000												VIII	310909	311909	1000
					IX	154437	155437	1000												VIII	315950	321983	6033
					IX	157437	158437	1000												VIII	323983	330054	6071
					IX	159437	160479	1042												VIII	331054	343221	12167
					IX	166540	167540	1000												VIII	344221	347257	3036
					IX	171604	172604	1000												VIII	351276	354276	3000
					IX	173604	175632	2028												VIII	355276	360026	4750
					IX	177878	179878	2000												VIII	361026	363026	2000
					IX	182925	184950	2025												VIII	365026	369353	4327
					IX	185950	186979	1029												VIII	371388	376581	5193
					IX	193014	194014	1000												VIII	377581	380635	3054
					IX	196014	198734	2720												VIII	381635	383674	2039
					IX	203734	211162	7428												VIII	385674	386757	1083
					IX	218307	219307	1000												VIII	387791	391424	3633
					IX	221307	222307	1000												VIII	393696	396696	3000
					IX	231384	232384	1000												VIII	400715	401786	1071
					IX	235384	240384	5000												VIII	402786	403786	1000
					IX	241445	242445	1000												VIII	414879	418879	4000
					IX	243445	245445	2000												VIII	419879	425964	6085
					IX	246802	247831	1029												VIII	426964	427964	1000
					IX	251895	252895	1000												VIII	429964	431964	2000
					IX	258190	259190	1000												VIII	433964	434964	1000
					IX	261190	264190	3000												VIII	436987	438987	2000
					IX	265237	267237	2000												VIII	439987	444987	5000
					IX	268346	270422	2076												VIII	446987	447987	1000
					IX	273462	276500	3038												VIII	449987	453064	3077
					IX	277500	279500	2000												VIII	454064	456064	2000
					IX	280588	281588	1000												VIII	457064	458064	1000
					IX	284588	286694	2106												VIII	459064	464324	5260
					IX	288743	289743	1000												VIII	469769	472861	3092
					IX	295978	296978	1000												VIII	475861	476899	1038
					IX	297978	303381	5403												VIII	481015	492087	11072
					IX	304381	306381	2000												VIII	495087	496087	1000
					IX	307381	310414	3033												VIII	497123	501123	4000
					IX	312466	313499	1033												VIII	502123	508182	6059
					IX	314570	315570	1000												VIII	510325	511325	1000
					IX	316570	318647	2077												VIII	512447	514510	2063
					IX	319647	326325	6678												VIII	517601	518601	1000
					IX	327325	331325	4000												VIII	520641	522641	2000
					IX	334625	336929	2304												VIII	524641	525641	1000
					IX	339954	340954	1000												VIII	527799	528939	1140
					IX	342979	344979	2000												VIII	531257	532257	1000
					IX	347979	349979	2000												VIII	537257	540292	3035
					IX	351055	353055	2000												VIII	541376	553564	12188
					IX	354055	355055	1000												VIII	554642	562223	7581
					IX	357109	359109	2000												IX	0	12053	12053
					IX	360109	361109	1000												IX	13053	24897	11844
					IX	363128	364224	1096												IX	33570	34570	1000
					IX	366258	367387	1129												IX	37570	38570	1000
					IX	368387	372542	4155												IX	98178	99178	1000
					IX	374542	379711	5169												IX	231384	232384	1000
					IX	380754	381773	1019												IX	316570	317570	1000
					IX	383939	385958	2019												IX	323647	325325	1678
					IX	389049	392809	3760												IX	335625	336929	1304
					IX	394016	395016	1000												IX	431403	434461	3058
					IX	396016	419152	23136												IX	437493	439493	2000
					IX	420178	428403	8225												X	0	12038	12038
					IX	429403	435461	6058												X	13038	21108	8070
					IX	437493	439493	2000												X	73927	74927	1000
					X	0	21108	21108												X	153592	154592	1000
					X	115474	116474	1000												X	204393	205393	1000
					X	153592	154592	1000												X	338336	339336	1000
					X	204393	205393	1000												X	355234	356234	1000
					X	338336	339336	1000												X	374182	375353	1171
					X	355234	356234	1000												X	453406	454406	1000
					X	374182	375353	1171												X	701349	703383	2034
					X	453406	454406	1000												X	728055	730055	2000
					X	728055	730055	2000												X	732109	734156	2047
					X	732109	734156	2047												X	735156	737214	2058
					X	742522	744522	2000												X	738522	740522	2000
					XI	0	3126	3126												X	742522	744522	2000
					XI	140502	141621	1119												XI	0	3126	3126
					XI	162367	163965	1598												XI	162367	163965	1598
					XI	512835	514145	1310												XI	218987	220297	1310
					XI	555025	556025	1000												XI	309528	310528	1000
					XI	665545	666545	1000												XI	432264	433264	1000
					XII	0	14268	14268												XI	555025	556025	1000
					XII	93928	94970	1042												XI	665545	666545	1000
					XII	96076	97076	1000												XII	0	14268	14268
					XII	221843	222843	1000												XII	47552	48552	1000
					XII	426452	427659	1207												XII	91246	92928	1682
					XII	451193	489695	38502												XII	93928	97076	3148
					XII	734164	735484	1320												XII	106494	107494	1000
					XII	793509	794828	1319												XII	221843	222843	1000
					XII	1003426	1004426	1000												XII	232885	233885	1000
					XII	1051334	1052664	1330												XII	410099	411099	1000
					XII	1058709	1078164	19455												XII	425452	426452	1000
					XIII	0	8684	8684												XII	451193	489695	38502
					XIII	162239	163239	1000												XII	516747	517747	1000
					XIII	462855	464187	1332												XII	734164	735484	1320
					XIII	917449	923596	6147												XII	750589	751589	1000
					XIV	0	16790	16790												XII	1002426	1004426	2000
					XIV	252286	253286	1000												XII	1017901	1018901	1000
					XIV	569728	571768	2040												XII	1051334	1052664	1330
					XIV	572768	573800	1032												XII	1060745	1078164	17419
					XIV	598931	603043	4112												XIII	0	8684	8684
					XIV	750851	753851	3000												XIII	195416	202320	6904
					XIV	772959	775977	3018												XIII	320820	322008	1188
					XIV	781060	783060	2000												XIII	462855	464187	1332
					XV	0	1143	1143												XIII	598947	600947	2000
					XV	10998	11998	1000												XIII	601947	602947	1000
					XV	22651	27723	5072												XIII	752944	753944	1000
					XV	28749	30151	1402												XIII	917449	923596	6147
					XV	112995	114407	1412												XIV	0	17790	17790
					XV	282129	283129	1000												XIV	61686	62722	1036
					XV	570842	572272	1430												XIV	202608	204608	2000
					XV	575272	577272	2000												XIV	252286	254286	2000
					XV	1069860	1072860	3000												XIV	331701	332737	1036
					XV	1073860	1090678	16818												XIV	442599	443648	1049
					XVI	0	16741	16741												XIV	499338	500338	1000
					XVI	17780	26780	9000												XIV	505338	506338	1000
					XVI	209972	211268	1296												XIV	561189	568728	7539
					XVI	701226	702281	1055												XIV	569728	573800	4072
					XVI	838121	839187	1066												XIV	597931	603043	5112
					XVI	880120	881461	1341												XIV	749814	752851	3037
					XVI	930481	935952	5471												XIV	772959	775977	3018
					XVI	936982	947790	10808												XIV	781060	783060	2000
					Mito	2024	4037	2013												XV	0	2143	2143
					Mito	9469	12832	3363												XV	10998	11998	1000
					Mito	16104	17104	1000												XV	22651	30151	7500
					Mito	24688	25722	1034												XV	39860	40860	1000
					Mito	32488	34313	1825												XV	207421	208421	1000
					Mito	58967	60068	1101												XV	225728	235146	9418
					Mito	79536	80784	1248												XV	236482	238643	2161
					SUM			856981												XV	241704	243738	2034
					SUMII			136405												XV	247738	249738	2000
					SUMIX			228889												XV	252738	258951	6213
																				XV	261951	262951	1000
																				XV	263951	276109	12158
																				XV	280129	290129	10000
																				XV	291180	293180	2000
																				XV	295180	296180	1000
																				XV	298201	299201	1000
																				XV	382317	383317	1000
																				XV	463538	464644	1106
																				XV	523315	524315	1000
																				XV	570842	572272	1430
																				XV	575272	578272	3000
																				XV	827853	828853	1000
																				XV	899923	900923	1000
																				XV	905955	907025	1070
																				XV	1069860	1070860	1000
																				XV	1071860	1072860	1000
																				XV	1073860	1090678	16818
																				XVI	0	16741	16741
																				XVI	17780	19780	2000
																				XVI	21780	25780	4000
																				XVI	66023	67023	1000
																				XVI	96277	97277	1000
																				XVI	135203	136238	1035
																				XVI	173891	174891	1000
																				XVI	186062	187062	1000
																				XVI	337900	338900	1000
																				XVI	377351	378351	1000
																				XVI	406768	407768	1000
																				XVI	557156	558156	1000
																				XVI	570939	572405	1466
																				XVI	637164	638164	1000
																				XVI	700226	702281	2055
																				XVI	795306	796306	1000
																				XVI	838121	839187	1066
																				XVI	844252	857649	13397
																				XVI	880120	881461	1341
																				XVI	934952	935952	1000
																				XVI	940236	941236	1000
																				XVI	942236	947790	5554
																				Mito	2024	4037	2013
																				Mito	7884	26779	18895
																				Mito	28242	31158	2916
																				Mito	32488	44645	12157
																				Mito	46042	47751	1709
																				Mito	49489	50992	1503
																				Mito	52778	54579	1801
																				Mito	57800	62250	4450
																				Mito	63894	80784	16890
																				Mito	82372	84263	1891
																				SUM			1054510
																				SUM_VIII			329002
