# Supplementary material for: Genome Sequencing and Comparative Analysis of Saccharomyces cerevisiae Strains of the Peterhof Genetic Collection
Source: PLOS journal article supplement (doi:10.1371/journal.pone.0154722), 2016-05-06
Supplement: S6 (10.1371/journal.pone.0154722.s006) [file journal.pone.0154722.s006]

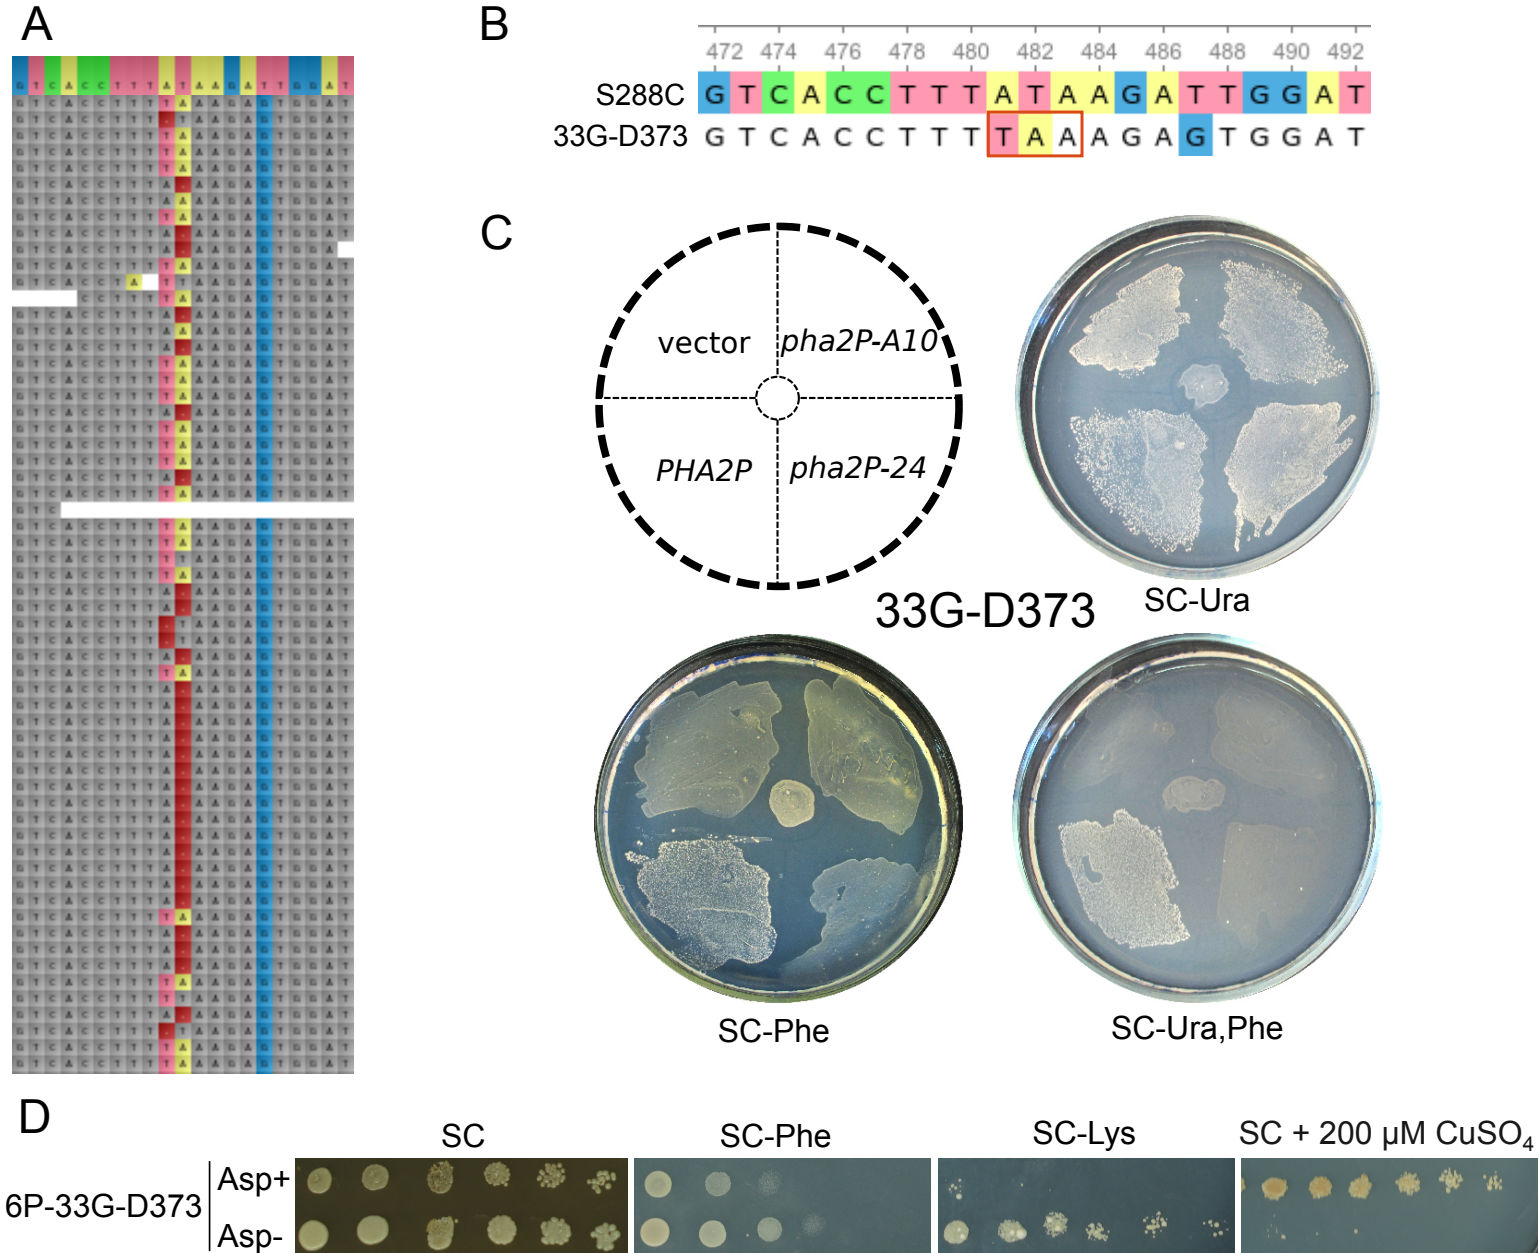

**S6 Fig**  
**Phenylalanine auxotrophy mutation *phaA10* is allelic to *PHA2***  
 (A) Short read alignment. (B) Sanger resequencing. Red frame, TAA nonsense mutation appearing at codon 161. (C) 33G-D373 plated on selective media immediately after transformation with low copy number plasmids bearing indicated *PHA2* alleles. Vector, pRS316. (D) Asp<sup>+</sup> and Asp<sup>-</sup> variants of 6P-33G-D373 spotted for nonsense suppression and copper resistance. Series of 5-fold dilutions are shown.
