# Supplementary material for: Genome Sequencing and Comparative Analysis of Saccharomyces cerevisiae Strains of the Peterhof Genetic Collection
Source: PLOS journal article supplement (doi:10.1371/journal.pone.0154722), 2016-05-06
Supplement: S7 (10.1371/journal.pone.0154722.s007) [file journal.pone.0154722.s007]

30 °C

37 °C

[*PSI*<sup>+</sup>]

vector

*MSN4*[*psi*<sup>-</sup>]

vector

*MSN4*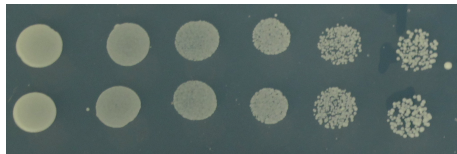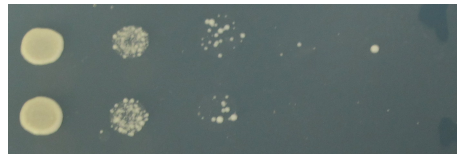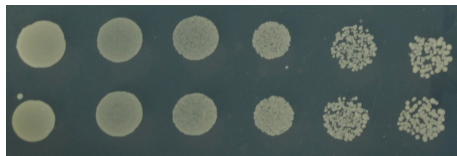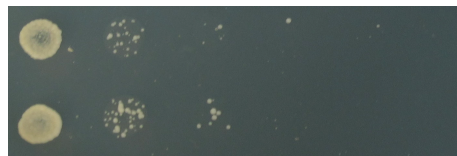

S7 Fig

**Nonsense mutation in *MSN4* does not contribute to thermosensitivity**

Introduction of a centromeric plasmid with the wild type *MSN4* allele does not influence thermotolerance in 74-D694 ([*psi*<sup>-</sup>]) and P-74-D694 ([*PSI*<sup>+</sup>]). Series of 5-fold dilutions are shown. Vector, pRS316.
